# Supplementary material for: Nematic to smectic texture transformation in MBBA by in situ synthesis of silver nanoparticles
Source: Royal Society of Chemistry journal article supplement (doi:10.1039/b909428h), 2010-01-01
Supplement: b909428h.pdf [file b909428h.pdf]

# Nematic to smectic texture transformation in MBBA by *in-situ* synthesis of silver nanoparticles

*P. K. Sudhadevi Antharjanam\* and Edamana Prasad\**

*Department of Chemistry, Indian Institute of Technology Madras (IITM), Chennai 600 036,  
India; Fax: +91-44-2257-4200, Phone: +91-44-2257-4232  
Email: [santharjanam@rediffmail.com](mailto:santharjanam@rediffmail.com); [pre@iitm.ac.in](mailto:pre@iitm.ac.in)*

---

## Supporting information

### List of contents

|                                                                                                                                                                      |    |
|----------------------------------------------------------------------------------------------------------------------------------------------------------------------|----|
| UV-Visible thin film absorption spectra of MBBA-Ag composite prepared using 1, 3 and 80 mol% of AgNO <sub>3</sub> after heating to isotropic temperature and cooling | S2 |
| UV-Visible absorption spectrum of a mixture of MBBA, 4-butylaniline and 4-methoxybenzaldehyde in thin film                                                           | S2 |
| SEM image of MBBA-Ag composite prepared using 1 mol% of AgNO <sub>3</sub> after heating to isotropic temperature and cooling                                         | S3 |
| SEM image of MBBA-Ag composite prepared using 3 mol% of AgNO <sub>3</sub> after heating to isotropic temperature and cooling                                         | S3 |
| SEM image of MBBA-Ag composite prepared using 5 mol% of AgNO <sub>3</sub> after heating to isotropic temperature and cooling                                         | S4 |
| OPM images of MBBA-Ag composite prepared using 1 mol% of AgNO <sub>3</sub>                                                                                           | S4 |
| OPM pictures of MBBA-Ag composite prepared using 3 mol% of AgNO <sub>3</sub>                                                                                         | S5 |
| NMR spectrum of MBBA-Ag composite after 3 days                                                                                                                       | S5 |
| Fluorescence spectrum of 4-butylaniline-Ag composite in thin film                                                                                                    | S6 |
| Fluorescence spectrum of a mixture of MBBA, 4-butylaniline and 4-methoxybenzaldehyde in thin film                                                                    | S6 |
| FT-IR spectrum of MBBA-Ag NP conjugate containing 80 mol% of AgNO <sub>3</sub> with respect to MBBA                                                                  | S7 |
| FT-IR spectrum of MBBA                                                                                                                                               | S8 |

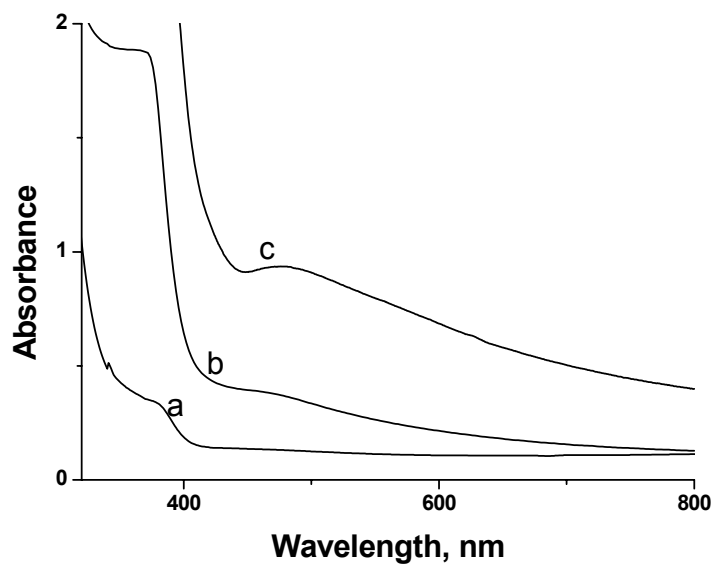

**Figure S1:** Uv-visible absorption spectra of silver nanoparticles prepared in MBBA using a) 1 mol %, b) 3 mol % and c) 80 mol % of AgNO<sub>3</sub>

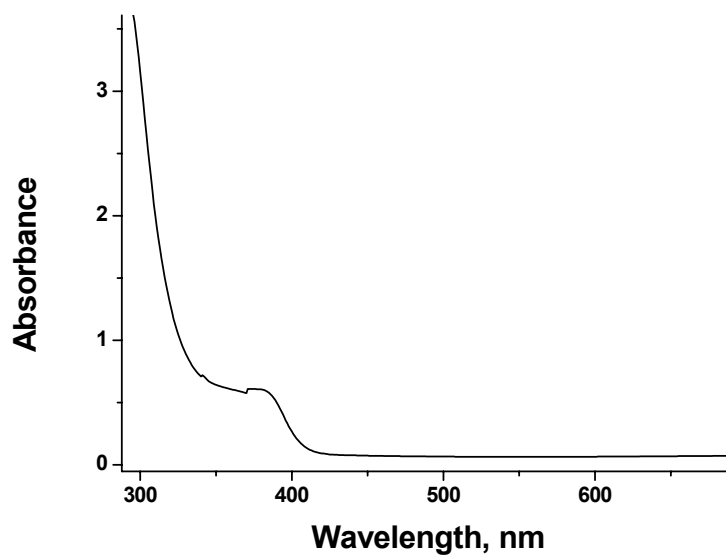

**Figure S2:** Uv-Visible absorption spectrum of a mixture of MBBA, 4-butylaniline and 4-methoxybenzaldehyde in thin film.

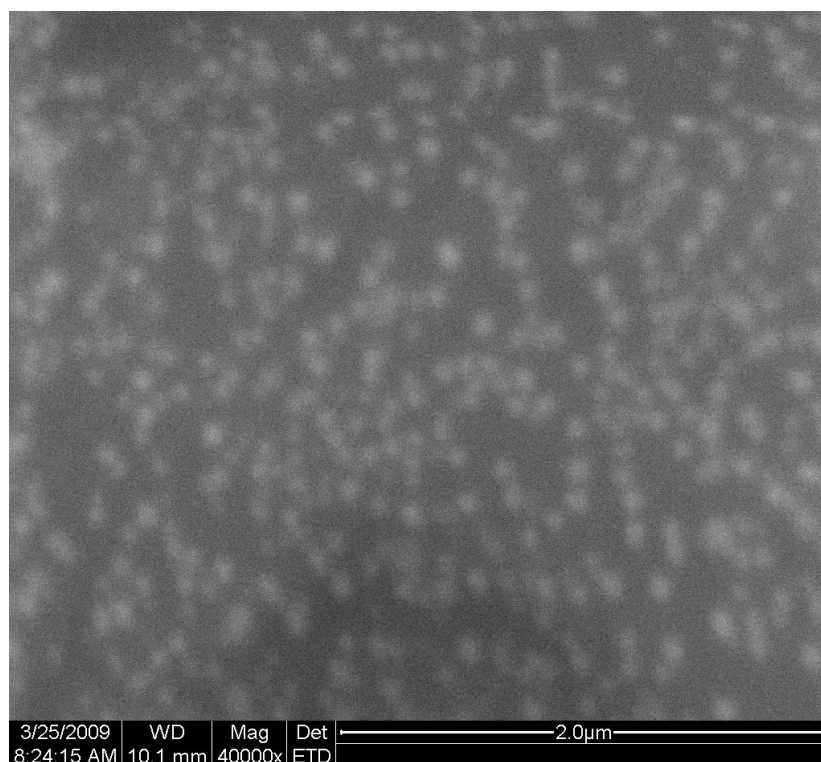

**Figure S3:** SEM image of silver nanoparticles prepared in MBBA using 1 mol % of  $\text{AgNO}_3$

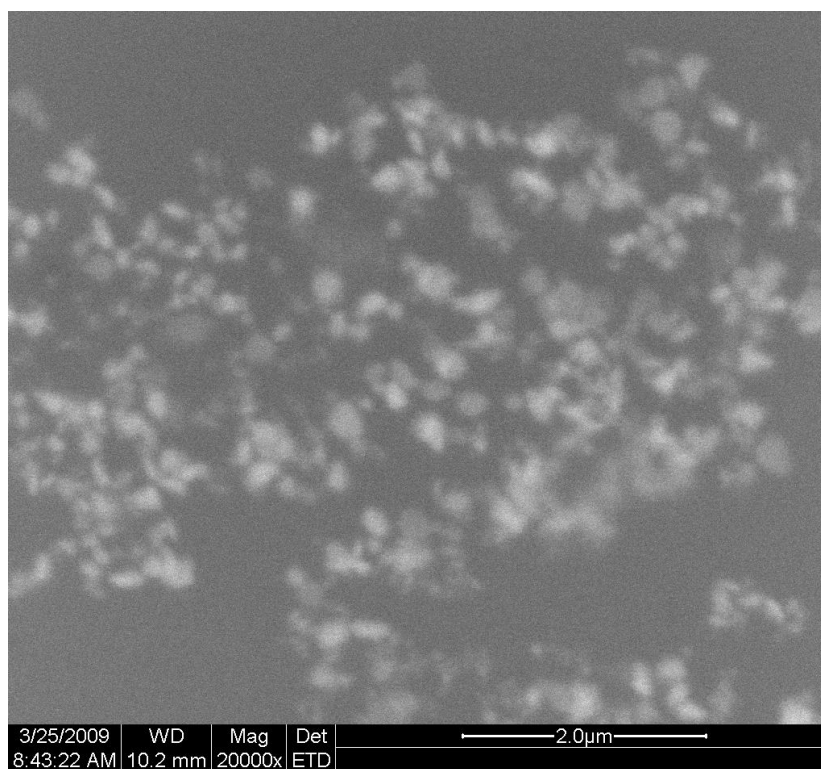

**Figure S4:** SEM image of silver nanoparticles prepared in MBBA using 3 mol % of  $\text{AgNO}_3$

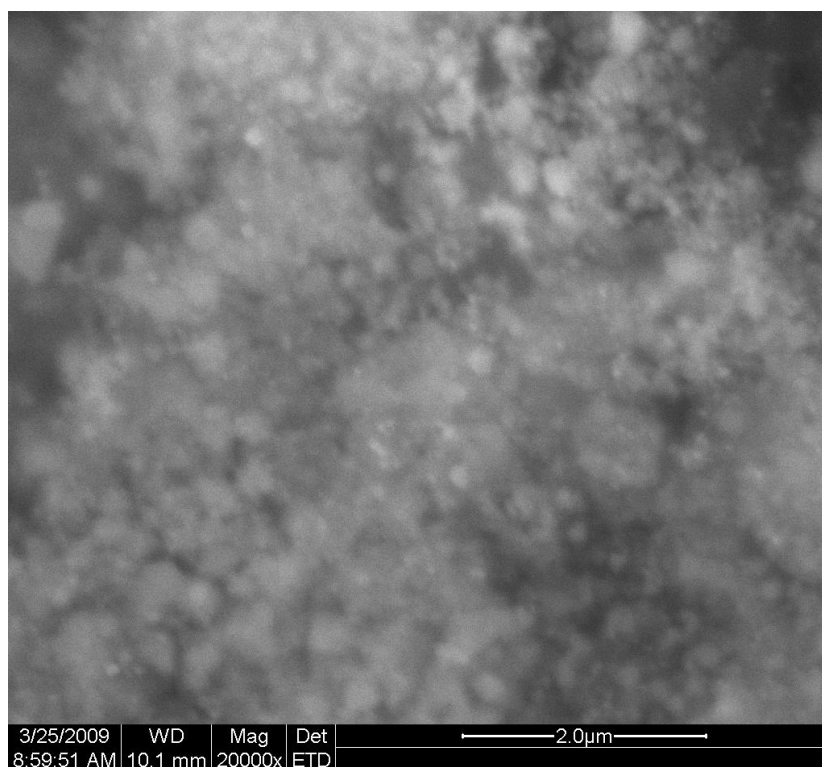

**Figure S5:** SEM image of silver nanoparticles prepared in MBBA using 5 mol % of  $\text{AgNO}_3$

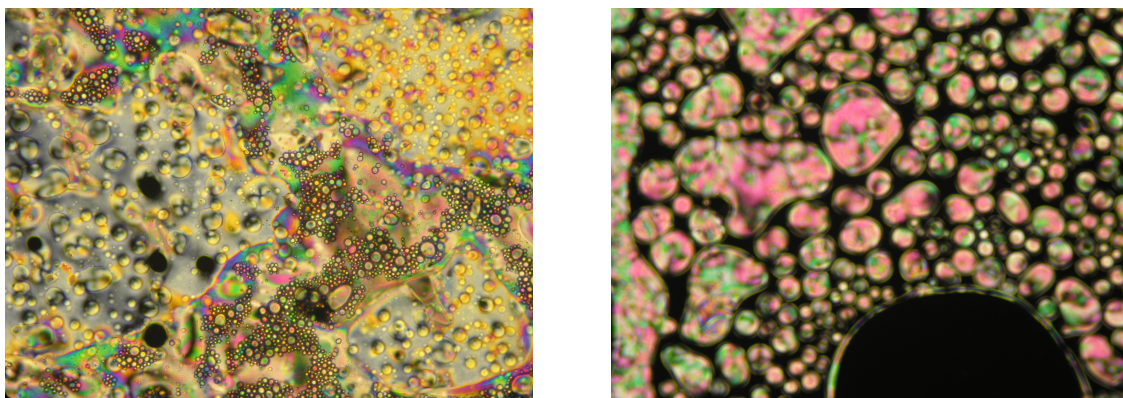

**Figure S6:** OPM pictures of MBBA-Ag composite prepared using 1 mol% a) before heating b) after heating and cooling. The nematic texture is lost on the second cycle of heating and cooling, followed by the appearance of rectangular blocks of MBBA-Ag composites.

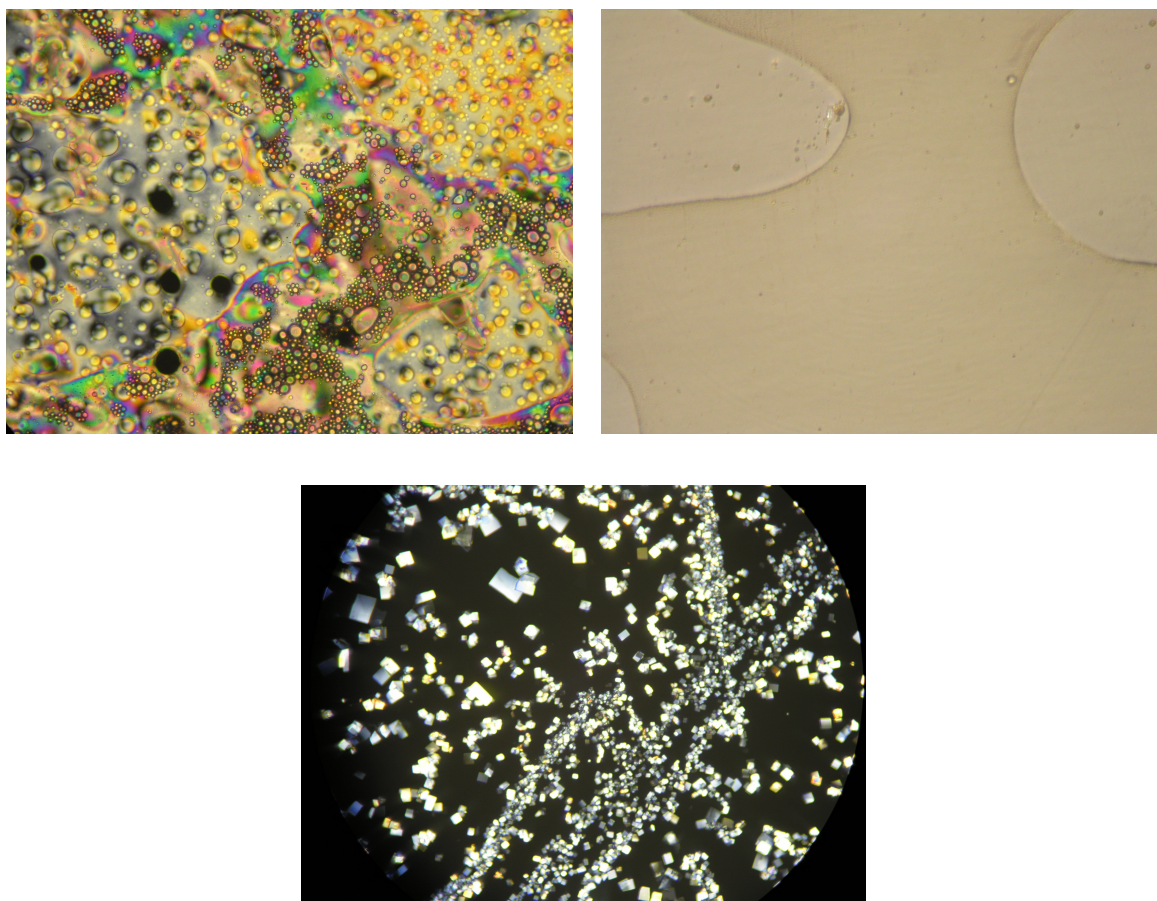

**Figure S7:** OPM pictures of MBBA-Ag composite prepared using 3 mol% of  $\text{AgNO}_3$ : a) before heating b) isotropic state and c) after heating and cooling.

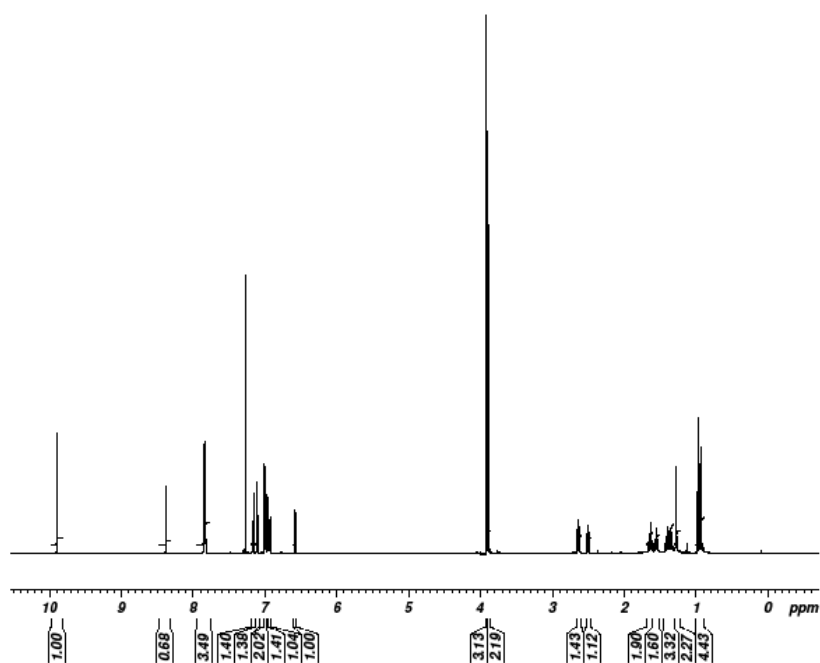

**Figure S8:** NMR spectrum of MBBA-Ag composite prepared using 80 mol% of  $\text{AgNO}_3$ , after 3 days

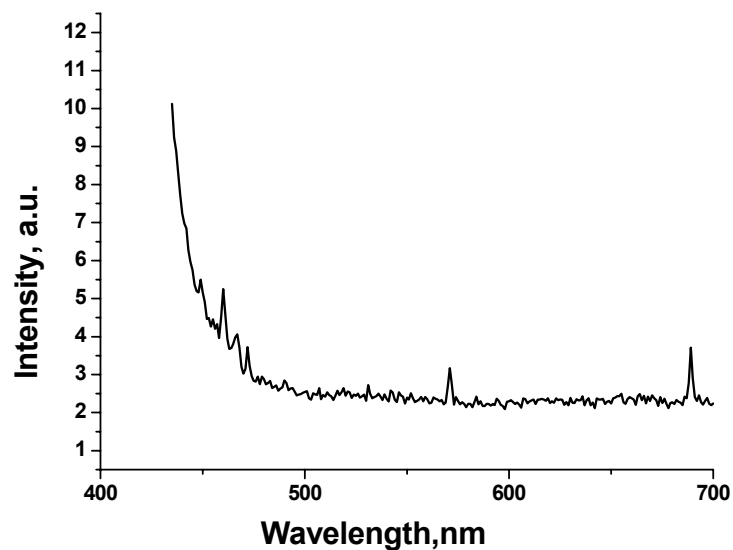

**Figure S9:** Fluorescence spectrum of 4-butylaniline-Ag composite in thin film. The Excitation wavelength was 420 nm. No emission is observed.

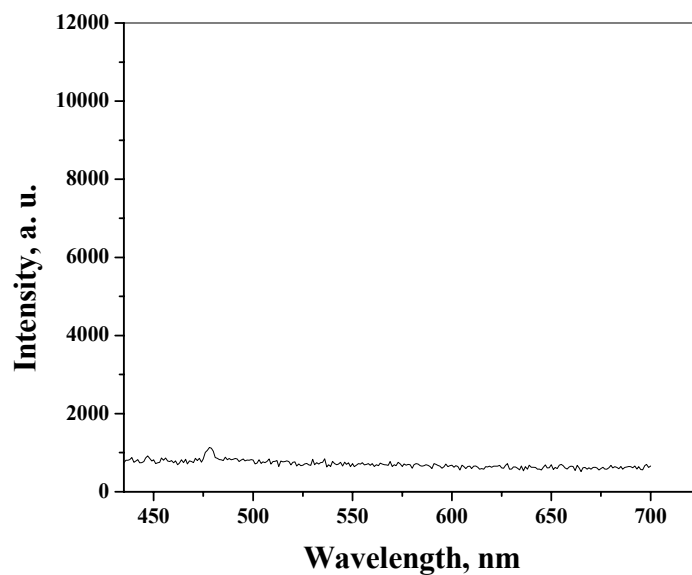

**Figure S10:** Fluorescence spectrum of a mixture of MBBA, 4-butylaniline and 4-methoxy benzaldehyde in thin film. Excitation wavelength was 420 nm. No emission was observed.

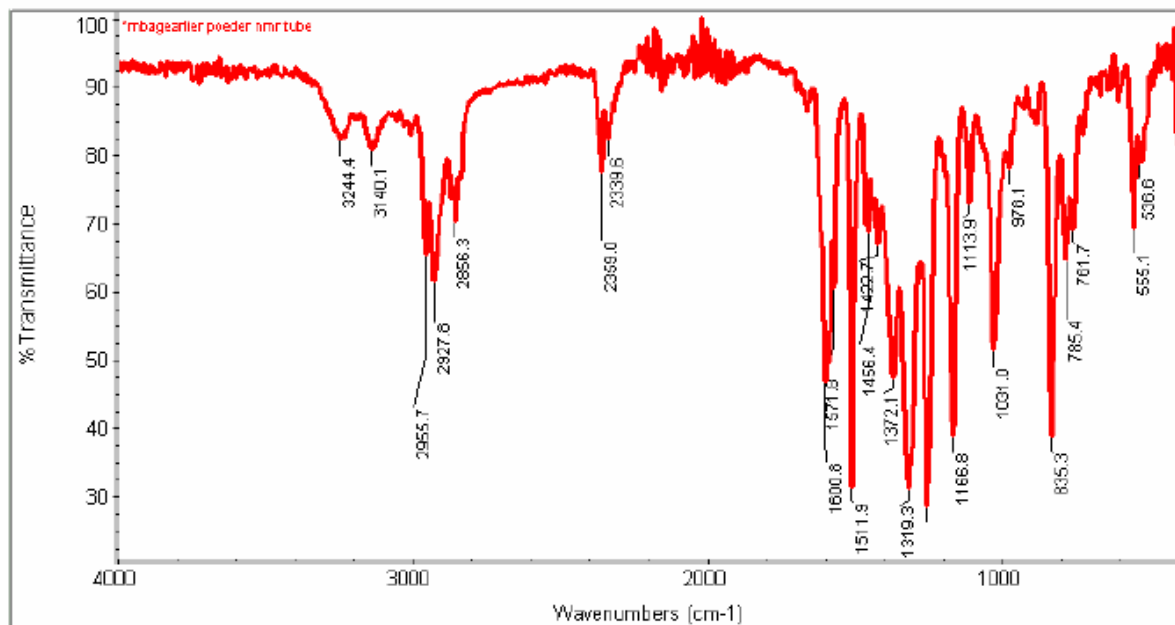

**Figure S11:** FT-IR spectrum of MBBA-Ag NP conjugate containing 80 mol% of AgNO<sub>3</sub> with respect to MBBA. The -C=N peak of MBBA originally appeared at 1625 cm<sup>-1</sup> (see figure below) is shifted to 1600 cm<sup>-1</sup>. Amines stretching vibrational frequencies are also shifted to lower frequencies (from normal values of 3400-3500 to 3244-3140 cm<sup>-1</sup>). The carbonyl of aldehyde should be overlapped with MBBA imine, as formation of aldehyde was evident from NMR spectra of the MBBA-Ag NP conjugate.

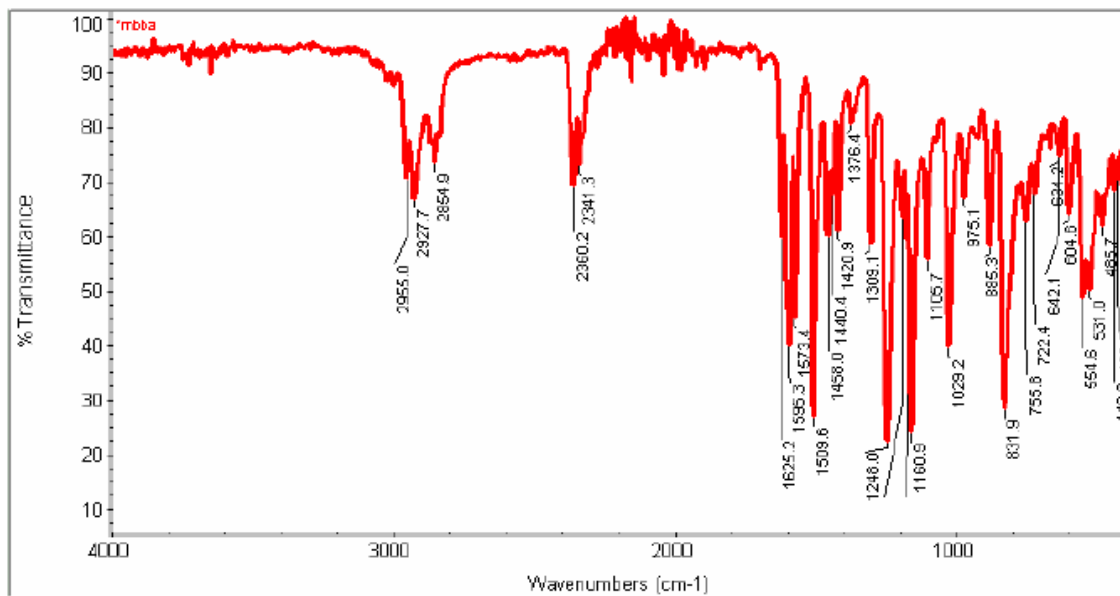

**Figure S12:** FT-IR spectrum of MBBA
